# Supplementary material for: DNaseI hypersensitivity at gene-poor, FSH dystrophy-linked 4q35.2
Source: PubMed Central journal article supplement — Nucleic Acids Res. 2009 Oct 9;37(22):7381–93. doi: 10.1093/nar/gkp833 (PMC2794184; doi:10.1093/nar/gkp833), 2009-10-09
Supplement: gkp833_1.pdf [file gkp833_1.pdf]

## Supplementary Figures S1 to S5, Figure Legends, and Tables S1 and S2

**Figure S1. Subtelomeric 4q has the lowest density of gene sequences of all the subtelomeric regions of q-arms.** The cumulative lengths of annotated (RefSeq) genes in the terminal 3 Mb of the q arms of all the human chromosomes are shown (hg18, <http://genome.ucsc.edu/>). The base-pair coverage of the 3-Mb subtelomeric region of 4q for RefSeq genes (shown above) is only 2% and for UCSC Genes (including RefSeq genes and predicted genes based upon Genbank, CCDS and UniProt, <http://genome.ucsc.edu/>; data not shown) is 9%. In comparison, the genome-wide base-pair coverage for Refseq genes in hg18 is 36% (1.14 Mb). For calculation of genes in this region, six copies of *DUX4* were included, as in hg18. The number of copies of the D4Z4 repeat with its *DUX4* subregion ranges between 1 and 100 but expression of *DUX4* is very low, not increased by a higher copy number, and thought to be mostly from the terminal copy, the only one with a distal polyA signal (1).

## **Figure S2. Distribution of DH sites in 4q35.2 relative to G+C content, GC isochores, interspersed DNA repeats, and sequence conservation among vertebrates**

The average data from three FSHD and three normal control myoblast cultures are shown. Green dots, unique DH sites seen in all six myoblast cultures; orange star, DH272, seen preferentially in the three FSHD myoblast cell strains; gray dots, DH peaks centered on simple tandem repeats (STRs). The % (G+C) for 5-bp windows, 17-way vertebrate sequence conservation, chicken/human sequence conservation, segmental duplications, short interspersed sequences (SINEs), long interspersed sequences (LINEs), long terminal repeats (LTRs), and RefSeq gene tracks are from the UCSC genome browser (<http://genome.ucsc.edu/>, hg18) and isochores from Isofinder (2).

**Figure S3. DH site mapping in six myoblast cell cultures: near the proximal end of 4q35.2**

The maps of DH sites in the vicinity of *FAT1* and *MTNR1A* are shown for each of the myoblast cell strains. Green dots, unique-sequence peaks seen in all myoblast cultures; gray dot, a DH site that overlapped a simple tandem repeat and was seen in all myoblast cultures. The coordinates of the repeat mask region were downloaded from the UCSC genome browser (hg18, rmsk3.27) and are displayed at the top as a dense tool to illustrate the regions where probes were missing from the array.

**Figure S4. DH site mapping in six myoblast cell cultures: the proximal end of 4q35.2**

The DH sites around *FAM149A* and *CYP4V2* are mapped and designated as in Figure S3. No DH sites were found in the vicinity of blood coagulation-related genes *KLKB1* and *F11*.

**Figure S5. Tested amplicons around DH272**

Amplicons around DH272 were chosen for qRT-PCR using the following gene prediction programs: EvoFold (3); FirstEF, first exon finder (4); RNAz, noncoding RNAs (5); and geneid (<http://genome.imim.es/software/geneid/index.html>). At the bottom is shown sequence conservation among 17 vertebrate species (hg18, <http://genome.ucsc.edu/>). The locations of the amplicons with the highest levels of transcripts (indicated by filled diamonds) suggest that these transcripts are not derived from protein-encoding RNAs, and so are ncRNAs. Note that the indicated gene predicted by geneid would have a coding sequence spanning 63 kb and that the end of the predicted gene that is shown is the 3' end. The distant, predicted 5' end has no DH site in its vicinity.

## References

1. Snider, L., Asawachaicharn, A., Tyler, A.E., Geng, L.N., Petek, L.M., Maves, L., Miller, D.G., Lemmers, R.J., Winokur, S.T., Tawil, R. *et al.* (2009) *Hum Mol Genet*, **18**, 2414-2430.
2. Oliver, J.L., Carpena, P., Hackenberg, M. and Bernaola-Galvan, P. (2004) *Nucleic Acids Res*, **32**, W287-292.
3. Pedersen, J.S., Bejerano, G., Siepel, A., Rosenbloom, K., Lindblad-Toh, K., Lander, E.S., Kent, J., Miller, W. and Haussler, D. (2006) *PLoS Comput Biol*, **2**, e33.
4. Davuluri, R.V., Grosse, I. and Zhang, M.Q. (2001) *Nat Genet*, **29**, 412-417.
5. Washietl, S., Hofacker, I.L. and Stadler, P.F. (2005) *Proc Natl Acad Sci U S A*, **102**, 2454-2459.

Figure S1. RefSeq genes in the terminal 3 Mb of each q arm: base coverage

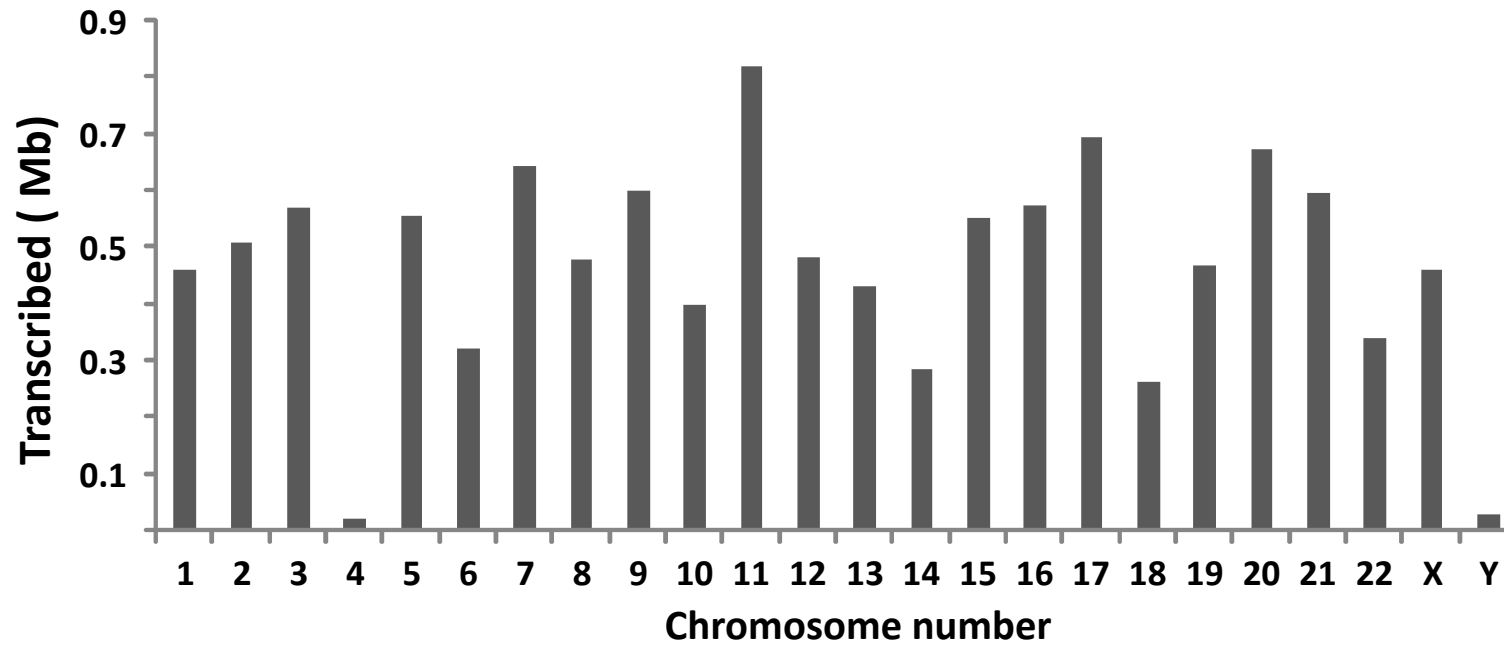

**Figure S2. Distribution of DH sites in 4q35.2 relative to G+C content, interspersed DNA repeats, and sequence conservation among vertebrates**

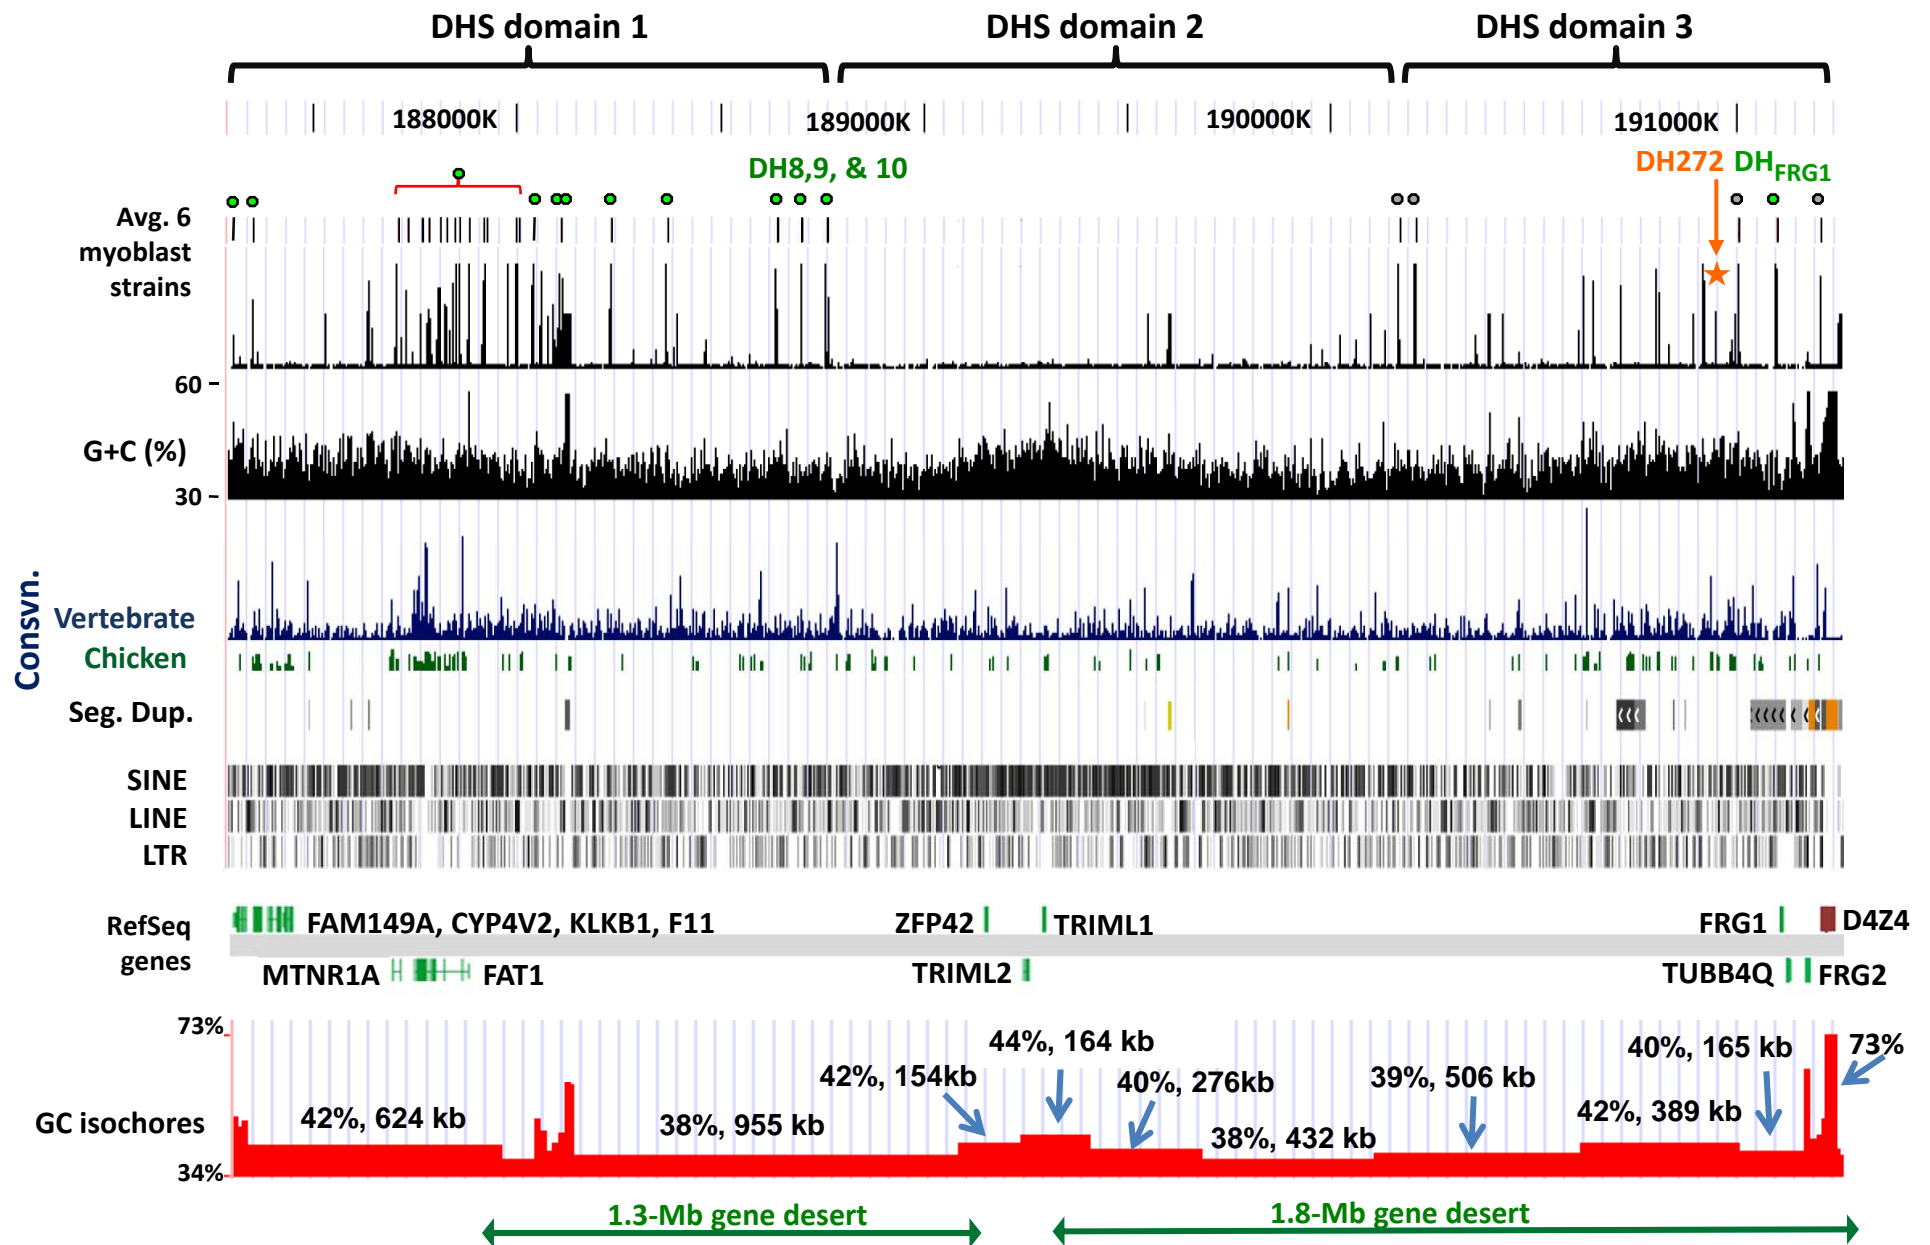

Figure S3. DH site mapping in six myoblast cell cultures: near the proximal end of 4q35.2

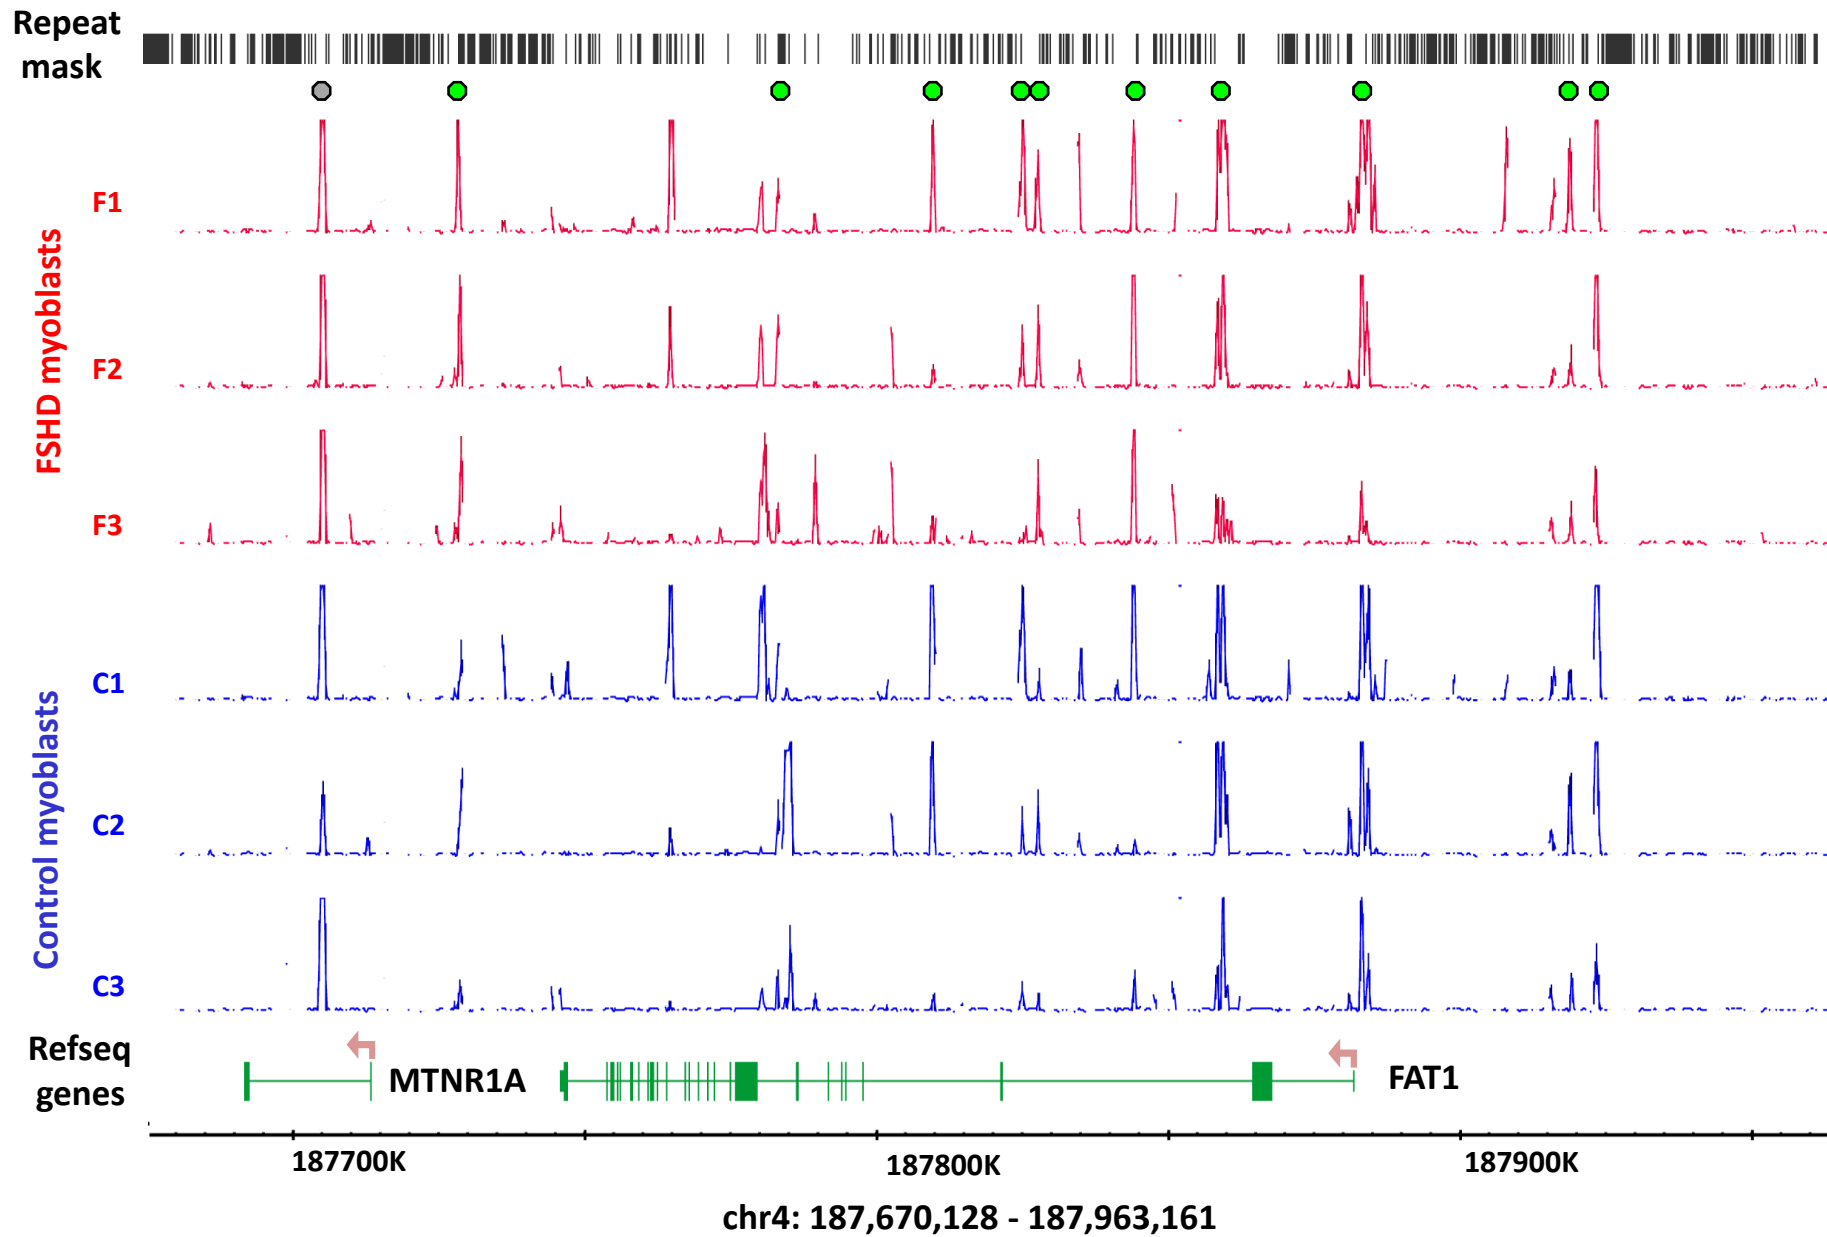

Figure S4. DH site mapping in six myoblast cell cultures: the proximal end of 4q35.2

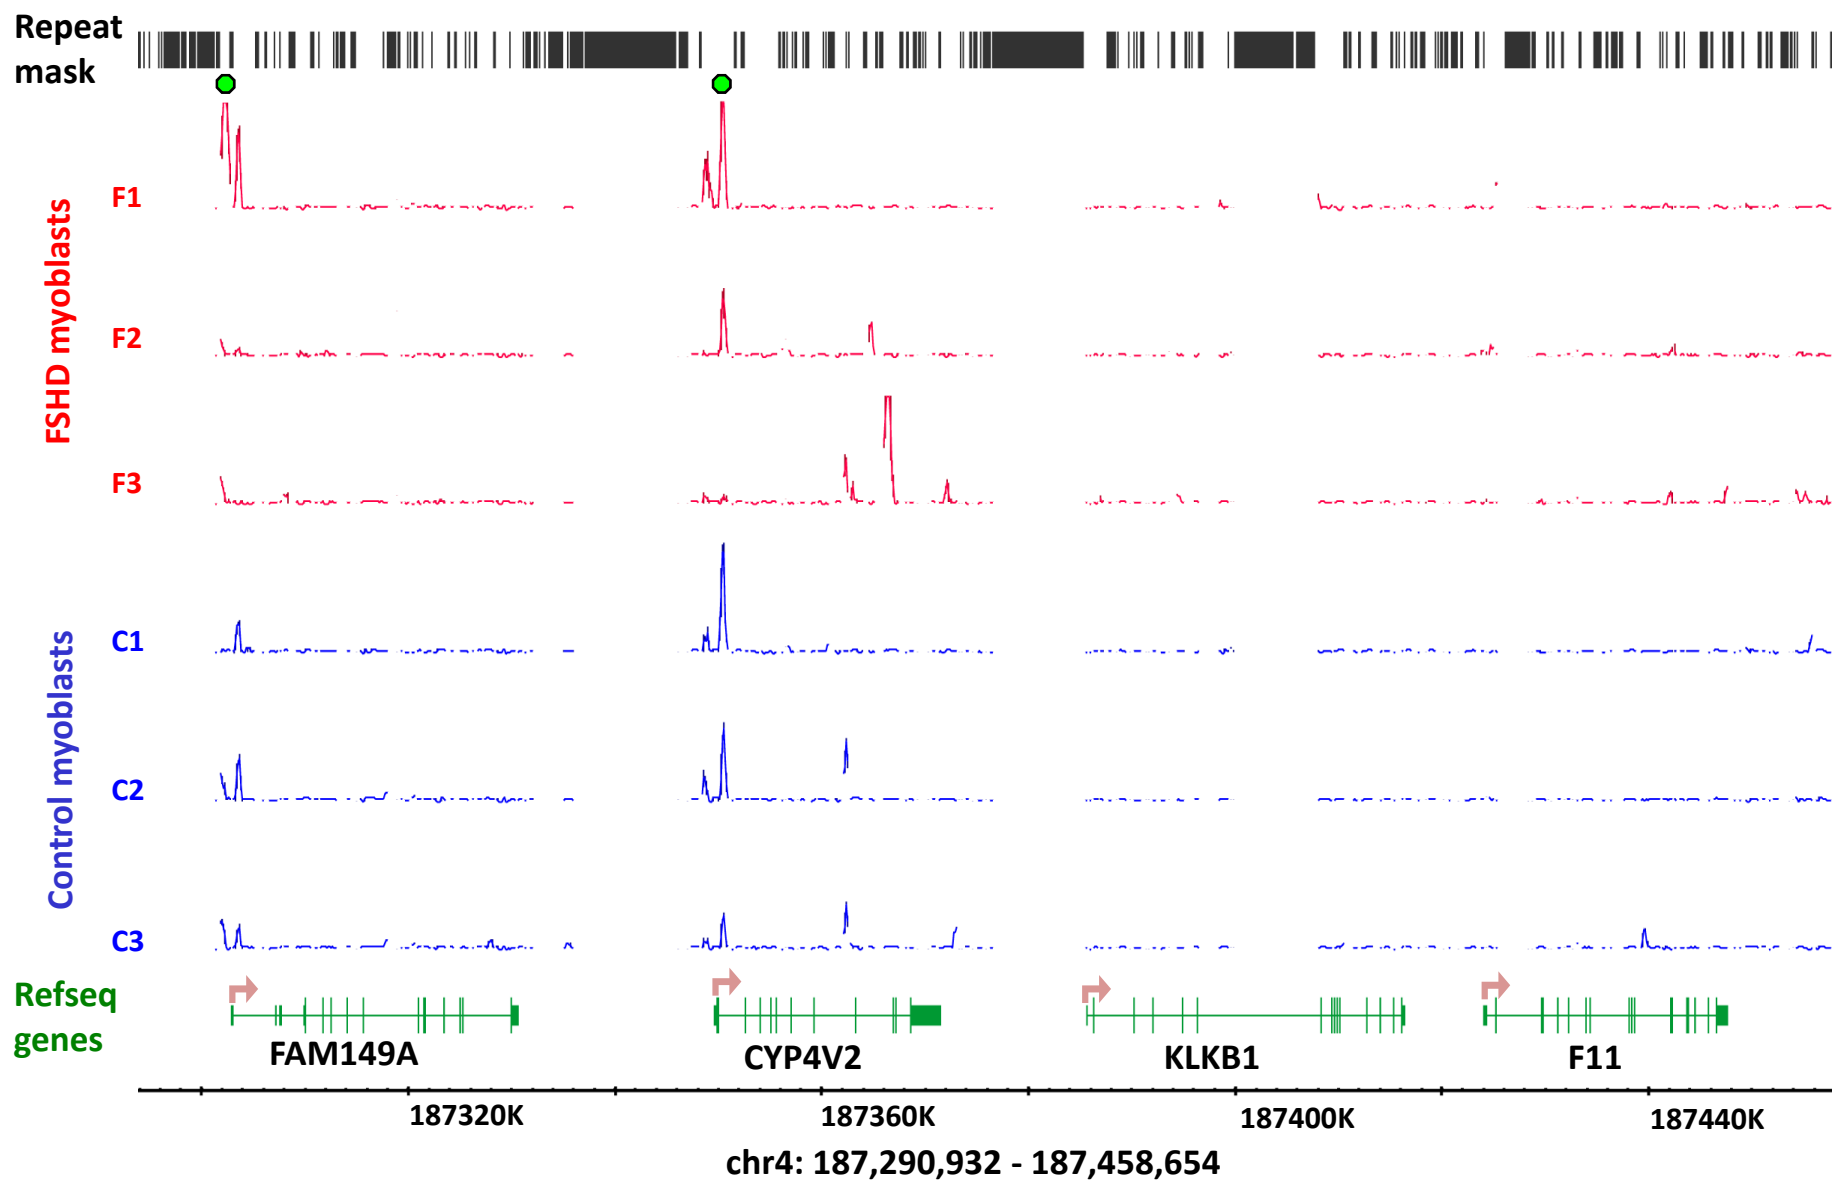

Figure S5. Tested amplicons around DH272: 

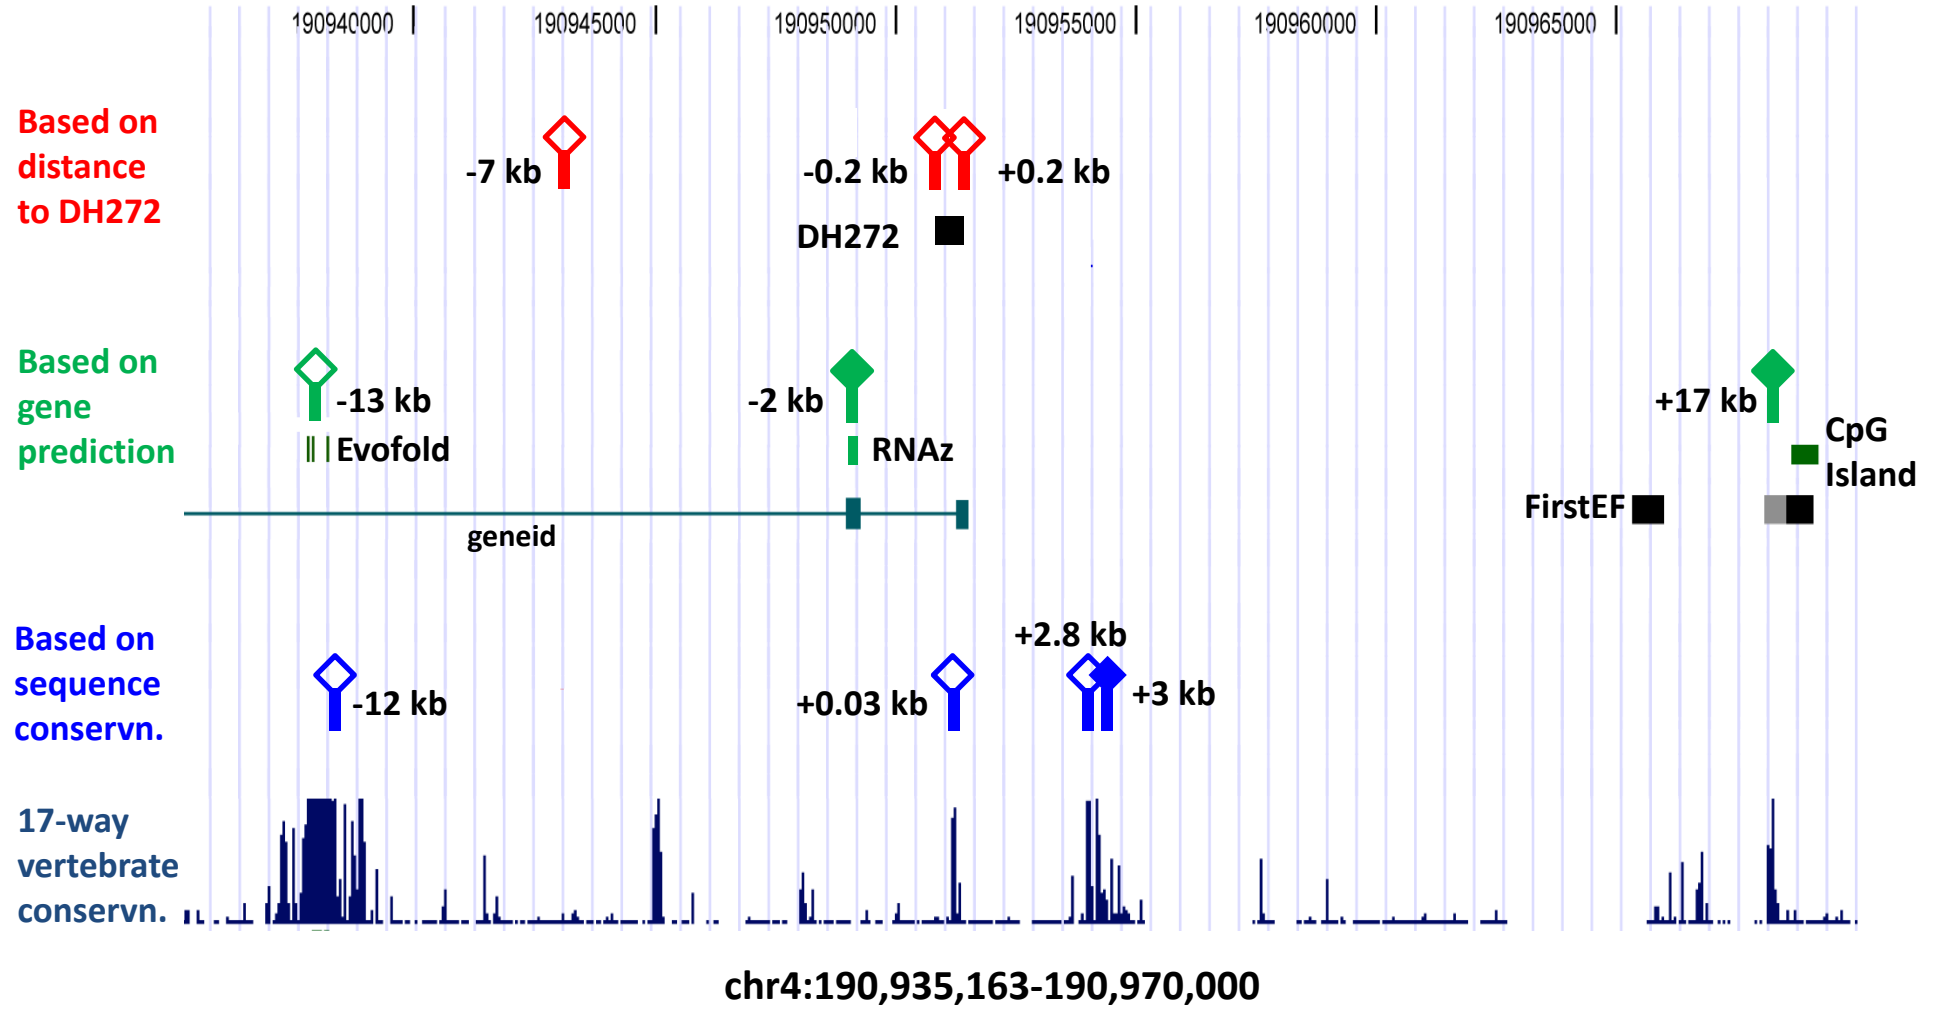



**Table S1. Positions, length, and GC content of DH sites in 4q35.2 in myoblast cell strains<sup>1</sup>**

**A. Unique-sequence DH sites located >20 kb from a RefSeq gene<sup>2</sup>**

|      | DH site name | DH site coordinates |           | G+C (%) | Length (bp) | Distance from the closest gene | Distance to D4Z4 (Mb) |
|------|--------------|---------------------|-----------|---------|-------------|--------------------------------|-----------------------|
| chr4 | DH2.2        | 187918708           | 187919336 | 44      | 628         | 37 kb from FAT1                | 3.30                  |
| chr4 | DH2.1        | 187922992           | 187924054 | 43      | 1062        | 41 Kb from FAT1                | 3.30                  |
| chr4 | DH3          | 187997838           | 187998472 | 48      | 634         | 116 kb from FAT1               | 3.23                  |
| chr4 | DH4          | 188002298           | 188003940 | 43      | 1642        | 120 kb from FAT1               | 3.22                  |
| chr4 | DH4.2        | 188062058           | 188062553 | 35      | 495         | 180 kb from FAT1               | 3.16                  |
| chr4 | DH5          | 188106569           | 188107300 | 46      | 731         | 225 kb from FAT1               | 3.12                  |
| chr4 | DH5.2        | 188111813           | 188112563 | 47      | 750         | 230 kb from FAT1               | 3.11                  |
| chr4 | DH6          | 188230158           | 188230684 | 44      | 526         | 348 kb from FAT1               | 2.99                  |
| chr4 | DH7          | 188367665           | 188368548 | 41      | 883         | 486 kb from FAT1               | 2.86                  |
| chr4 | DH8          | 188636930           | 188637268 | 45      | 338         | 517 kb to ZFP42                | 2.59                  |
| chr4 | DH9          | 188699311           | 188700213 | 42      | 902         | 454 kb to ZFP42                | 2.52                  |
| chr4 | DH10         | 188760478           | 188761641 | 42      | 1163        | 392 kb to ZFP42                | 2.46                  |
| chr4 | DH272        | 190950856           | 190951416 | 45      | 560         | 148 kb to FRG1                 | 0.27                  |

**B. Unique-sequence DH sites inside or within 20 kb of a RefSeq gene**

|                         | DH site name   | DH site coordinates |                  | G+C (%)   | Length (bp) | Position in gene region     | Distance to D4Z4 (Mb) |
|-------------------------|----------------|---------------------|------------------|-----------|-------------|-----------------------------|-----------------------|
| <b>chr4<sup>3</sup></b> | <b>DH0</b>     | <b>187302067</b>    | <b>187303834</b> | <b>63</b> | <b>1767</b> | <b>5' region of FAM149A</b> | <b>3.92</b>           |
| <b>chr4</b>             | <b>DH1</b>     | <b>187350357</b>    | <b>187350725</b> | <b>51</b> | <b>368</b>  | <b>1st Intron of CYP4V2</b> | <b>3.87</b>           |
| chr4                    | DH2.5_0        | 187728443           | 187729227        | 45        | 784         | 15 kb 5' to MTNR1A          | 3.49                  |
| chr4                    | DH2.5_1        | 187782947           | 187783450        | 37        | 503         | interior intron of FAT1     | 3.44                  |
| chr4                    | DH2.5_2        | 187809329           | 187810057        | 51        | 728         | interior intron of FAT1     | 3.41                  |
| chr4                    | DH2.5_3        | 187824363           | 187825476        | 44        | 1113        | interior intron of FAT1     | 3.40                  |
| chr4                    | DH2.5_4        | 187827360           | 187828109        | 46        | 749         | interior intron of FAT1     | 3.40                  |
| chr4                    | DH2.5_5        | 187843853           | 187844382        | 41        | 529         | interior intron of FAT1     | 3.38                  |
| chr4                    | DH2.4          | 187858206           | 187860259        | 51        | 2053        | interior intron of FAT1     | 3.36                  |
| <b>chr4</b>             | <b>DH2.3</b>   | <b>187883010</b>    | <b>187884536</b> | <b>49</b> | <b>1526</b> | <b>promoter of FAT1</b>     | <b>3.34</b>           |
| <b>chr4</b>             | <b>DH_FRG1</b> | <b>191098015</b>    | <b>191099317</b> | <b>60</b> | <b>1302</b> | <b>promoter of FRG1</b>     | <b>0.12</b>           |

**C. DH sites that overlapped an Simple Tandem Repeat (STR)<sup>4</sup>**

|             | DH site name | DH site coordinates |                  | G+C (%)   | Length (bp) | Distance from the closest gene | Distance to D4Z4 (Mb) | STR consensus (bp) | No. of tandem copies | STR consensus sequence                                                                                                                             |
|-------------|--------------|---------------------|------------------|-----------|-------------|--------------------------------|-----------------------|--------------------|----------------------|----------------------------------------------------------------------------------------------------------------------------------------------------|
| <b>chr4</b> | <b>DH2.6</b> | <b>187704727</b>    | <b>187705595</b> | <b>60</b> | <b>868</b>  | <b>1st Intron, MTNR1A</b>      | <b>3.52</b>           | 32                 | 23                   | TCCACACCACCCCTGTTCTGGGACACACCG                                                                                                                     |
| chr4        | DH11         | 190168604           | 190170157        | 51        | 1553        | 863 kb from TRIML1             | 1.05                  | 54                 | 26                   | TCCAGTGCCCATTCCTCTAAAGTGACGTCTGTATCACTCTGCTCGAAAGTG                                                                                                |
| chr4        | DH12         | 190209068           | 190210621        | 50        | 1553        | 888 kb to FRG1                 | 1.01                  | 27                 | 59                   | GGTGTCCTACTGTAAAAGCTGCACTCG                                                                                                                        |
| chr4        | DH13         | 191004109           | 191005407        | 62        | 1298        | 93 kb to FRG1                  | 0.22                  | 32                 | 38                   | TCCGTGCCGTGCCCTCGGCTCTCCCATTC                                                                                                                      |
| chr4        | DH15         | 191207299           | 191208180        | 58        | 881         | 15 kb to DUX4                  | 0.015                 | 142                | 3                    | CCCTGAGCCTGGTGCATGCTGGGATTGCACTGCTGCAGCCCTGTGACCAAAGG<br>GCTGGGAGTGTATTGAGACTGCATCTCCAGCAAGACCAGCGAGAGGCGCG<br>GAGCCTCGTCCCTTCTCCAGTGATTAGCGCACTCT |

<sup>1</sup>The displayed DH sites were observed in all six examined myoblast cultures (FSHD and control) except for DH272, which was seen preferentially in FSHD myoblasts (Figure S3).

<sup>2</sup>These DH sites did not overlap repeat sequences. The distance is shown for the closest end of a given gene.

<sup>3</sup>The 5 DH sites seen at or near the 5' ends of genes are shown in boldface.

<sup>4</sup>Of the DH sites overlapping STRs, all except DH15 were centered on the STR such that there was >80% overlap. For DH15 the overlap was about 50%.

**Table S2. Primers used for qRT-PCR**

| Name of amplicon <sup>1</sup> | Forward primer                | Reverse primer               |
|-------------------------------|-------------------------------|------------------------------|
| -13kb                         | TTGTACAATCTAGCTTTAATGAAGTGCAA | TTGTAGTTCTTAAATGGAGTGTTTCAGA |
| -12kb                         | GGGGGACCATAAATACGTGTAC        | AAAACTTTTCTCAAAAAGCCATT      |
| -7kb                          | GCATCATATCCAGGTCCCATCA        | TGGATTCCCCACTTGCTAGAA        |
| -2kb                          | TCCTCCTCACACGGCTCCCTG         | GATGGGTGTTGCCATCAAGGT        |
| -0.2kb                        | TTTTTCTTTCTGCCTTTCGAGAAC      | TCTTTCCGCCTCTCCAATCA         |
| +0.03kb                       | GGGTCAGATCTTCAGAGAAGTTT       | CATAAAATGTATTGTGAGGGCAG      |
| +0.2kb                        | TTCCTGCACCGTCTTTACCG          | AGGGTCCATGACCCAGATGA         |
| +2.8kb                        | ATCACAAAGATACTTCACTCTCAACTT   | CGGCCAGTCTAATTACATCAA        |
| +3kb                          | TGGTGTGTTTGTTCCTTGGG          | TGCAAATGCCTGGTACTGCTG        |
| +17kb                         | TCCAGTTCGCAATCAGTTGAAA        | CCAGCTGGTTAATTTAGGGTGCT      |

<sup>1</sup>These amplicons are described in Figures 6 and S5 and were the indicated distance from DH272
